# Supplementary material for: Variable selection in microbiome compositional data analysis
Source: PubMed Central journal article supplement — NAR Genom Bioinform. 2020 May 13;2(2):lqaa029. doi: 10.1093/nargab/lqaa029 (PMC7671404; doi:10.1093/nargab/lqaa029), 2020-05-13
Supplement: lqaa029_supplemental_file.pdf [file lqaa029_supplemental_file.pdf]

# Variable selection in microbiome compositional data analysis

Antoni Susin, Yiwen Wang, Kim-Anh Lê Cao, M.Luz Calle

## SUPPLEMENTAL MATERIAL

We considered two different schemes for generating the dependent variable  $Y$ :

### 1. Log-contrast method:

We defined the values of  $Y$  (1 or 0) according to the probability of  $Y = 1$  given by a logistic model with a log-contrast function of the true associated taxa ( $X_1, \dots, X_{k_1}$ ) given by

$$P(Y = 1) = 1/(1 + \exp(-(S - \bar{S})))$$

$$\text{where } S = \sum_{j=1}^{k_1} b_j \log X_j \text{ with the constraint } \sum_{j=1}^{k_1} b_j = 0$$

Table of  $b_j$  coefficients

| Dataset | number associated (k1) | number not associated (k2) | b1 | b2   | b3   | b4 | b5 | b6 | b7 | b8 | b9 | b10 |
|---------|------------------------|----------------------------|----|------|------|----|----|----|----|----|----|-----|
| Crohn   | 3                      | 10                         | 1  | -0.5 | -0.5 |    |    |    |    |    |    |     |
|         | 3                      | 20                         | 1  | -0.5 | -0.5 |    |    |    |    |    |    |     |
|         | 3                      | 30                         | 1  | -0.5 | -0.5 |    |    |    |    |    |    |     |
|         | 3                      | 40                         | 1  | -0.5 | -0.5 |    |    |    |    |    |    |     |
|         | 5                      | 10                         | 3  | 3    | -2   | -2 | -2 |    |    |    |    |     |
|         | 5                      | 20                         | 3  | 3    | -2   | -2 | -2 |    |    |    |    |     |
|         | 5                      | 30                         | 3  | 3    | -2   | -2 | -2 |    |    |    |    |     |
|         | 5                      | 40                         | 3  | 3    | -2   | -2 | -2 |    |    |    |    |     |
|         | 10                     | 10                         | 1  | 2    | 3    | 4  | 5  | -1 | -2 | -3 | -4 | -5  |
|         | 10                     | 20                         | 1  | 2    | 3    | 4  | 5  | -1 | -2 | -3 | -4 | -5  |
|         | 10                     | 30                         | 1  | 2    | 3    | 4  | 5  | -1 | -2 | -3 | -4 | -5  |
|         | 10                     | 40                         | 1  | 2    | 3    | 4  | 5  | -1 | -2 | -3 | -4 | -5  |
| HFHS    | 3                      | 100                        | 1  | -0.5 | -0.5 |    |    |    |    |    |    |     |
|         | 3                      | 200                        | 1  | -0.5 | -0.5 |    |    |    |    |    |    |     |
|         | 3                      | 300                        | 1  | -0.5 | -0.5 |    |    |    |    |    |    |     |
|         | 3                      | 400                        | 1  | -0.5 | -0.5 |    |    |    |    |    |    |     |
|         | 5                      | 100                        | 3  | 3    | -2   | -2 | -2 |    |    |    |    |     |
|         | 5                      | 200                        | 3  | 3    | -2   | -2 | -2 |    |    |    |    |     |
|         | 5                      | 300                        | 3  | 3    | -2   | -2 | -2 |    |    |    |    |     |
|         | 5                      | 400                        | 3  | 3    | -2   | -2 | -2 |    |    |    |    |     |
|         | 10                     | 100                        | 1  | 2    | 3    | 4  | 5  | -1 | -2 | -3 | -4 | -5  |
|         | 10                     | 200                        | 1  | 2    | 3    | 4  | 5  | -1 | -2 | -3 | -4 | -5  |
|         | 10                     | 300                        | 1  | 2    | 3    | 4  | 5  | -1 | -2 | -3 | -4 | -5  |
|         | 10                     | 400                        | 1  | 2    | 3    | 4  | 5  | -1 | -2 | -3 | -4 | -5  |

## **2. K-means method:**

We computed the Aitchison distance of the samples restricted to the first  $k_1$  columns of  $\mathbf{X}$  (associated taxa) and performed the K-means clustering method with  $K=2$ . This process divided the samples into two groups according to their similar profile with respect to the associated taxa. We defined  $Y = 0$  for the individuals in one cluster and  $Y = 1$  for the individuals in the other.
